# Supplementary material
Source: MDPI journal article supplement (https://www.mdpi.com/2571-9637/2/2/27)
Supplement: s1 [file s1]

## **Formic acid oxidation on Pd thin film coated Au nanocrystals**

*Yongan Tang<sup>1</sup>, and Shouzhong Zou<sup>2\*</sup>*

Department of Chemistry and Biochemistry, Miami University, Oxford, OH 45056, USA

<sup>1</sup>present address: DOD Technologies Inc., Cary, IL 60013, USA

<sup>2</sup>present address: Department of Chemistry, American University, Washington, DC 20016, USA

\*corresponding author. Email: [szou@american.edu](mailto:szou@american.edu)

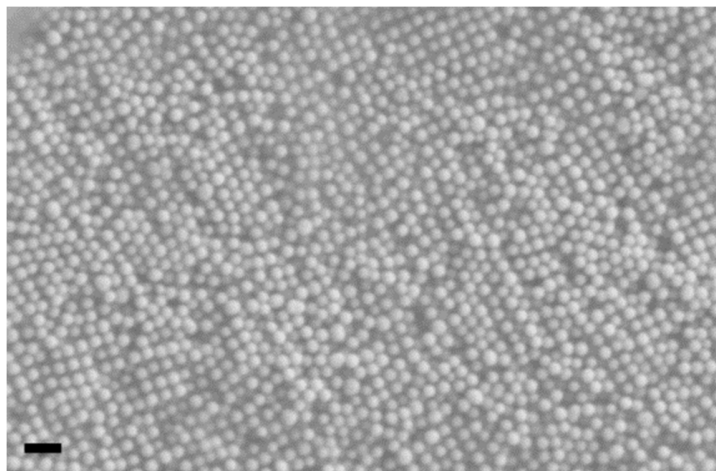

**Figure S1.** SEM image of as prepared Au seeds, scale bar: 100 nm

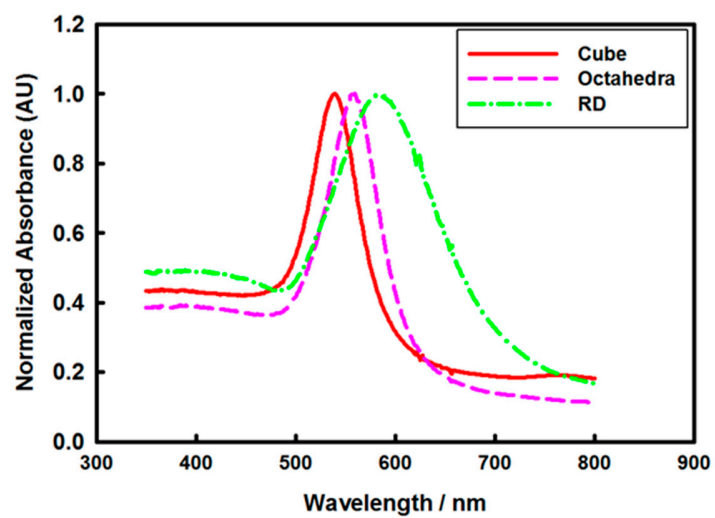

**Figure S2.** UV-Vis spectra of cubic, octahedral, and RD gold nanocrystals

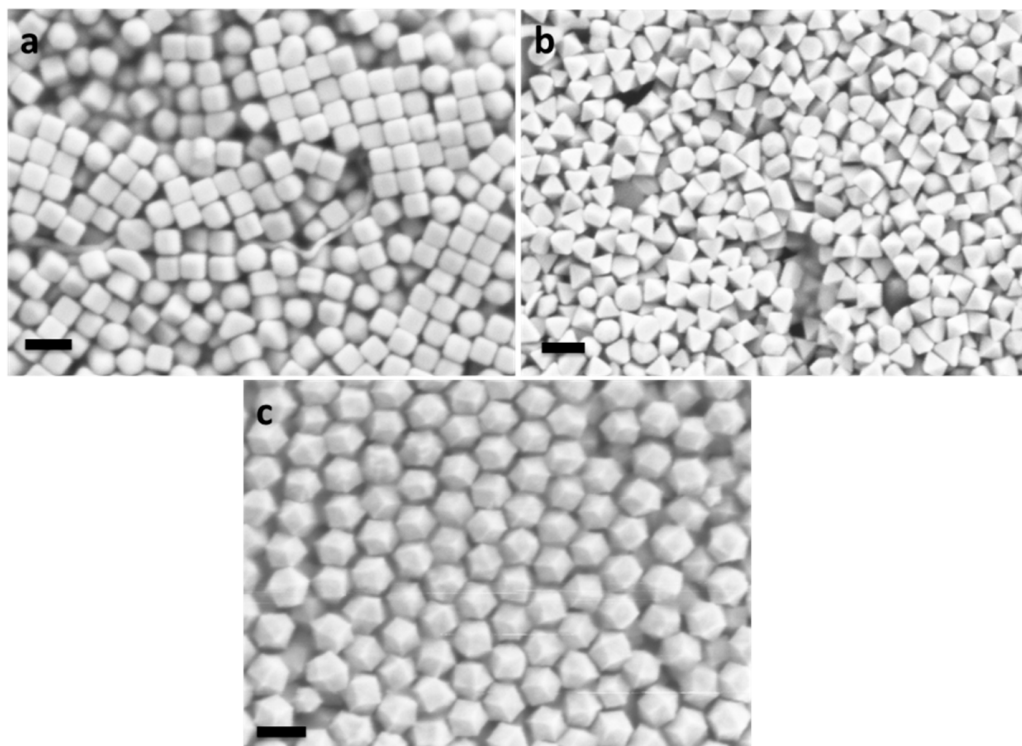

**Figure S3.** SEM image of larger (a) cubic, (b) octahedral, (c) RD Au nanocrystals synthesized with 100  $\mu\text{L}$  the Au seed solution. Scale bar: 200 nm

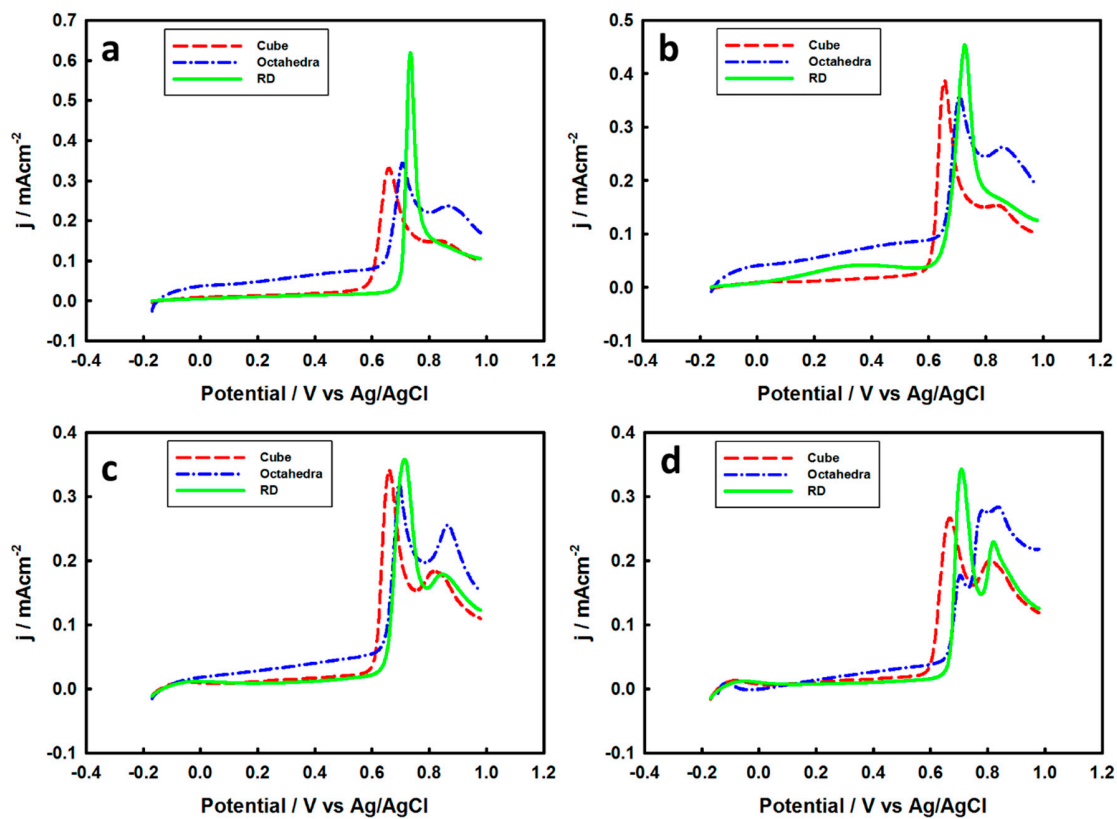

**Figure S4.** CO stripping voltammograms obtained from (a) two, (b) three, (c) five, and (d) ten monolayers of Pd deposited on cubic, octahedral and RD Au nanocrystals in 0.1 M  $\text{HClO}_4$ , scan rate:  $0.100 \text{ V s}^{-1}$
